# Supplementary material for: From Postmortem Molecular Studies to Social Determinants of Health Relevant to Racial and Ethnic Disparities
Source: Atypon-hosted journal article supplement (doi:10.1176/appi.ajp.20230402), 2023-07-01
Supplement: AJP_20230402_correction01.pdf [file AJP_20230402_correction01.pdf]

## **Correction to Kalin**

When the Editor's Note (10.1176/appi.ajp.20230402) was published in the July 2023 issue on July 1, 2023, the term "employee sponsored health insurance" was listed as one of the measures of social determinants of health. The term was changed to "employer-sponsored health insurance" and the article was republished online on August 4, 2023.
